# Supplementary material for: The Risk Analyses of Lymph Node Metastasis and Recurrence for Submucosal Invasive Colorectal Cancer: Novel Criteria to Skip Completion Surgery
Source: MDPI journal article supplement (doi:10.3390/cancers14030822), 2022-02-06
Supplement: s1 [file s1]

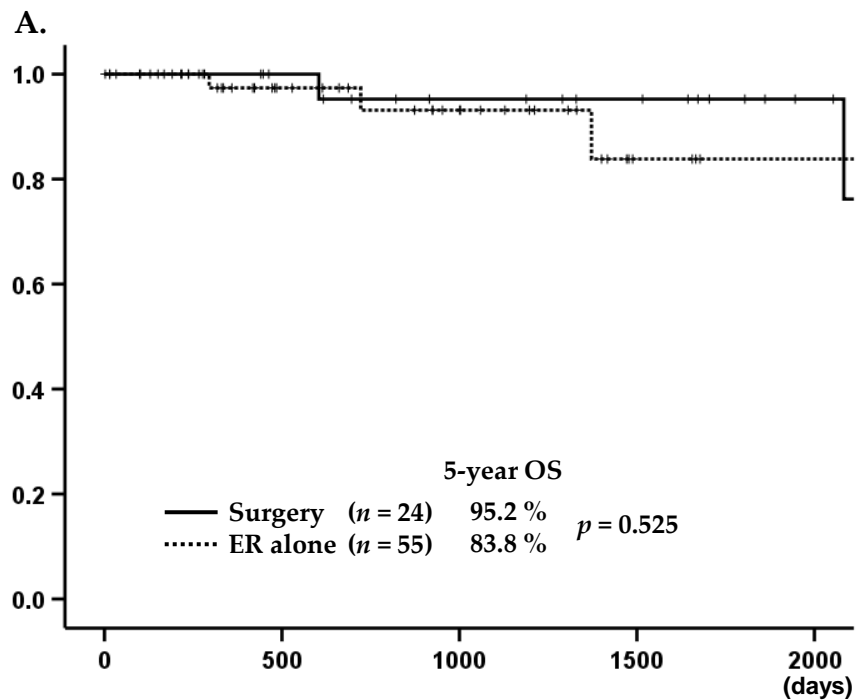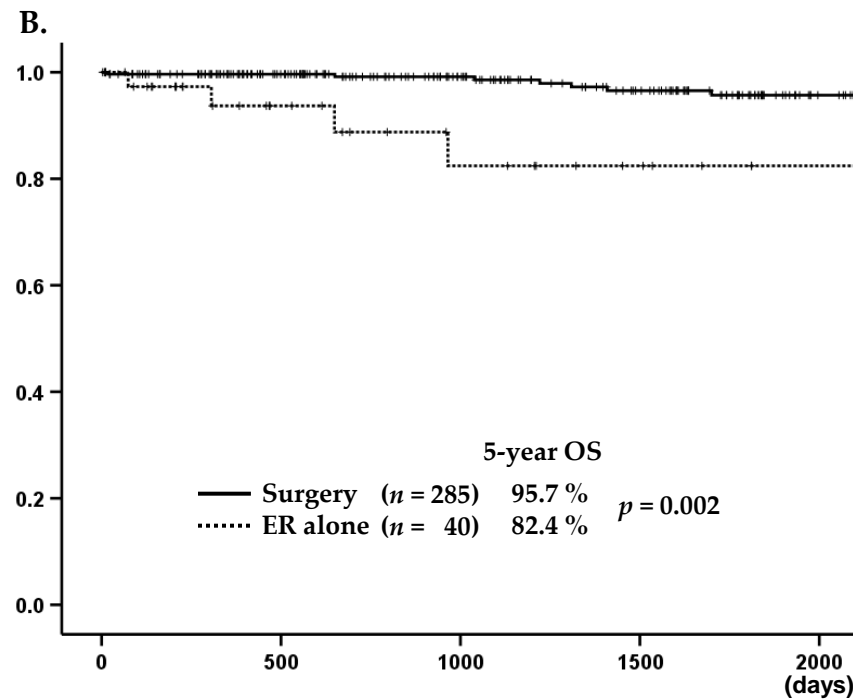

**Supplementary Figure S1. Overall survival between endoscopic resection alone and surgical resection**

**A. Low-risk pT1, B. High-risk pT1**

ER, endoscopic resection; 5-year OS, 5-year overall survival rate

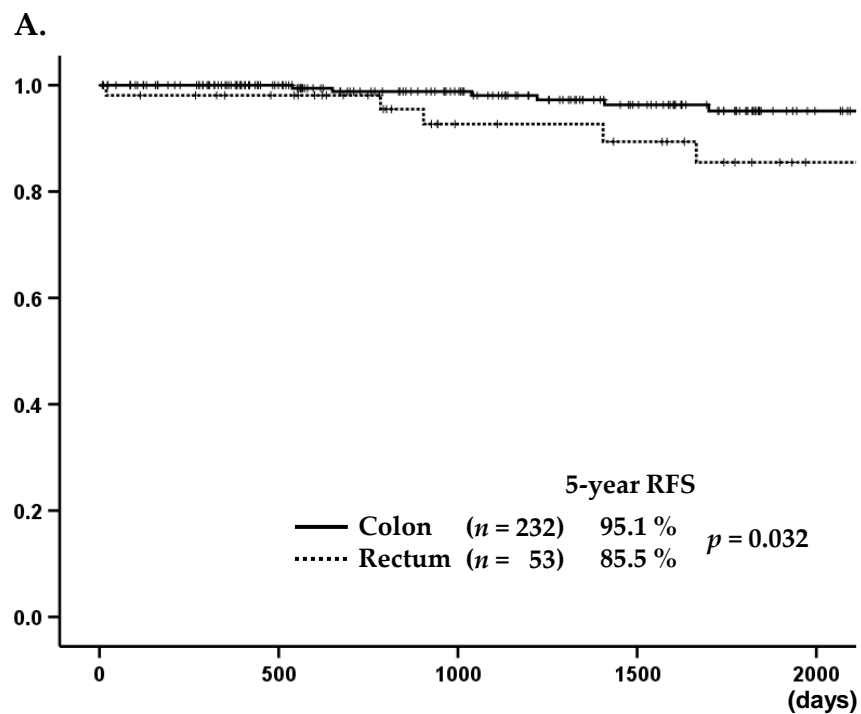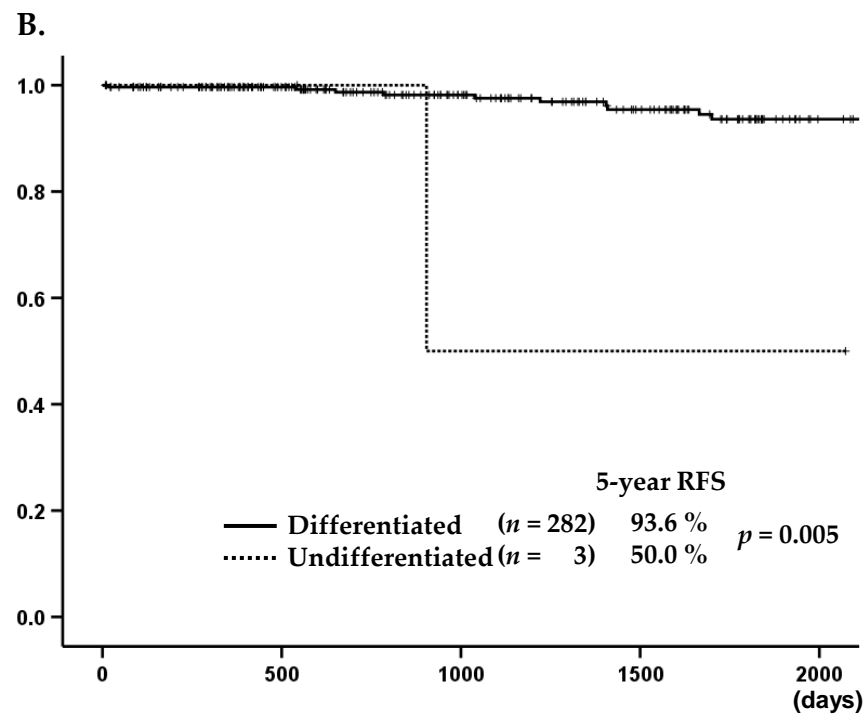

**Supplementary Figure S2. Relapse-free survival in the high-risk CRC with surgical resection**

**A. Tumor location, B. Histology**

5-year RFS, 5-year relapse-free survival rate

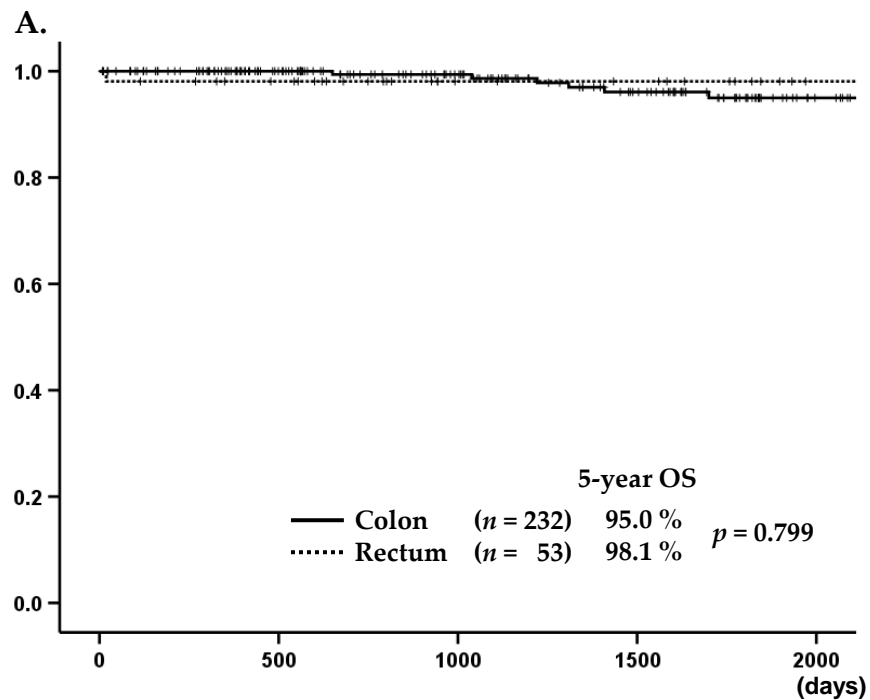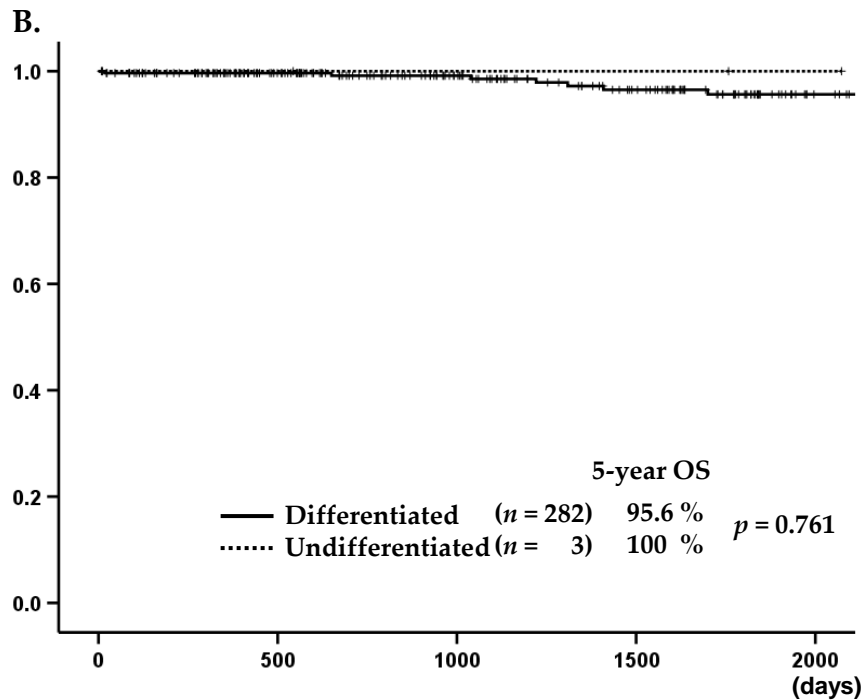

**Supplementary Figure S3. Overall survival in the high-risk CRC with surgical resection**

**A. Tumor location, B. Histology**

5-year OS, 5-year overall survival rate

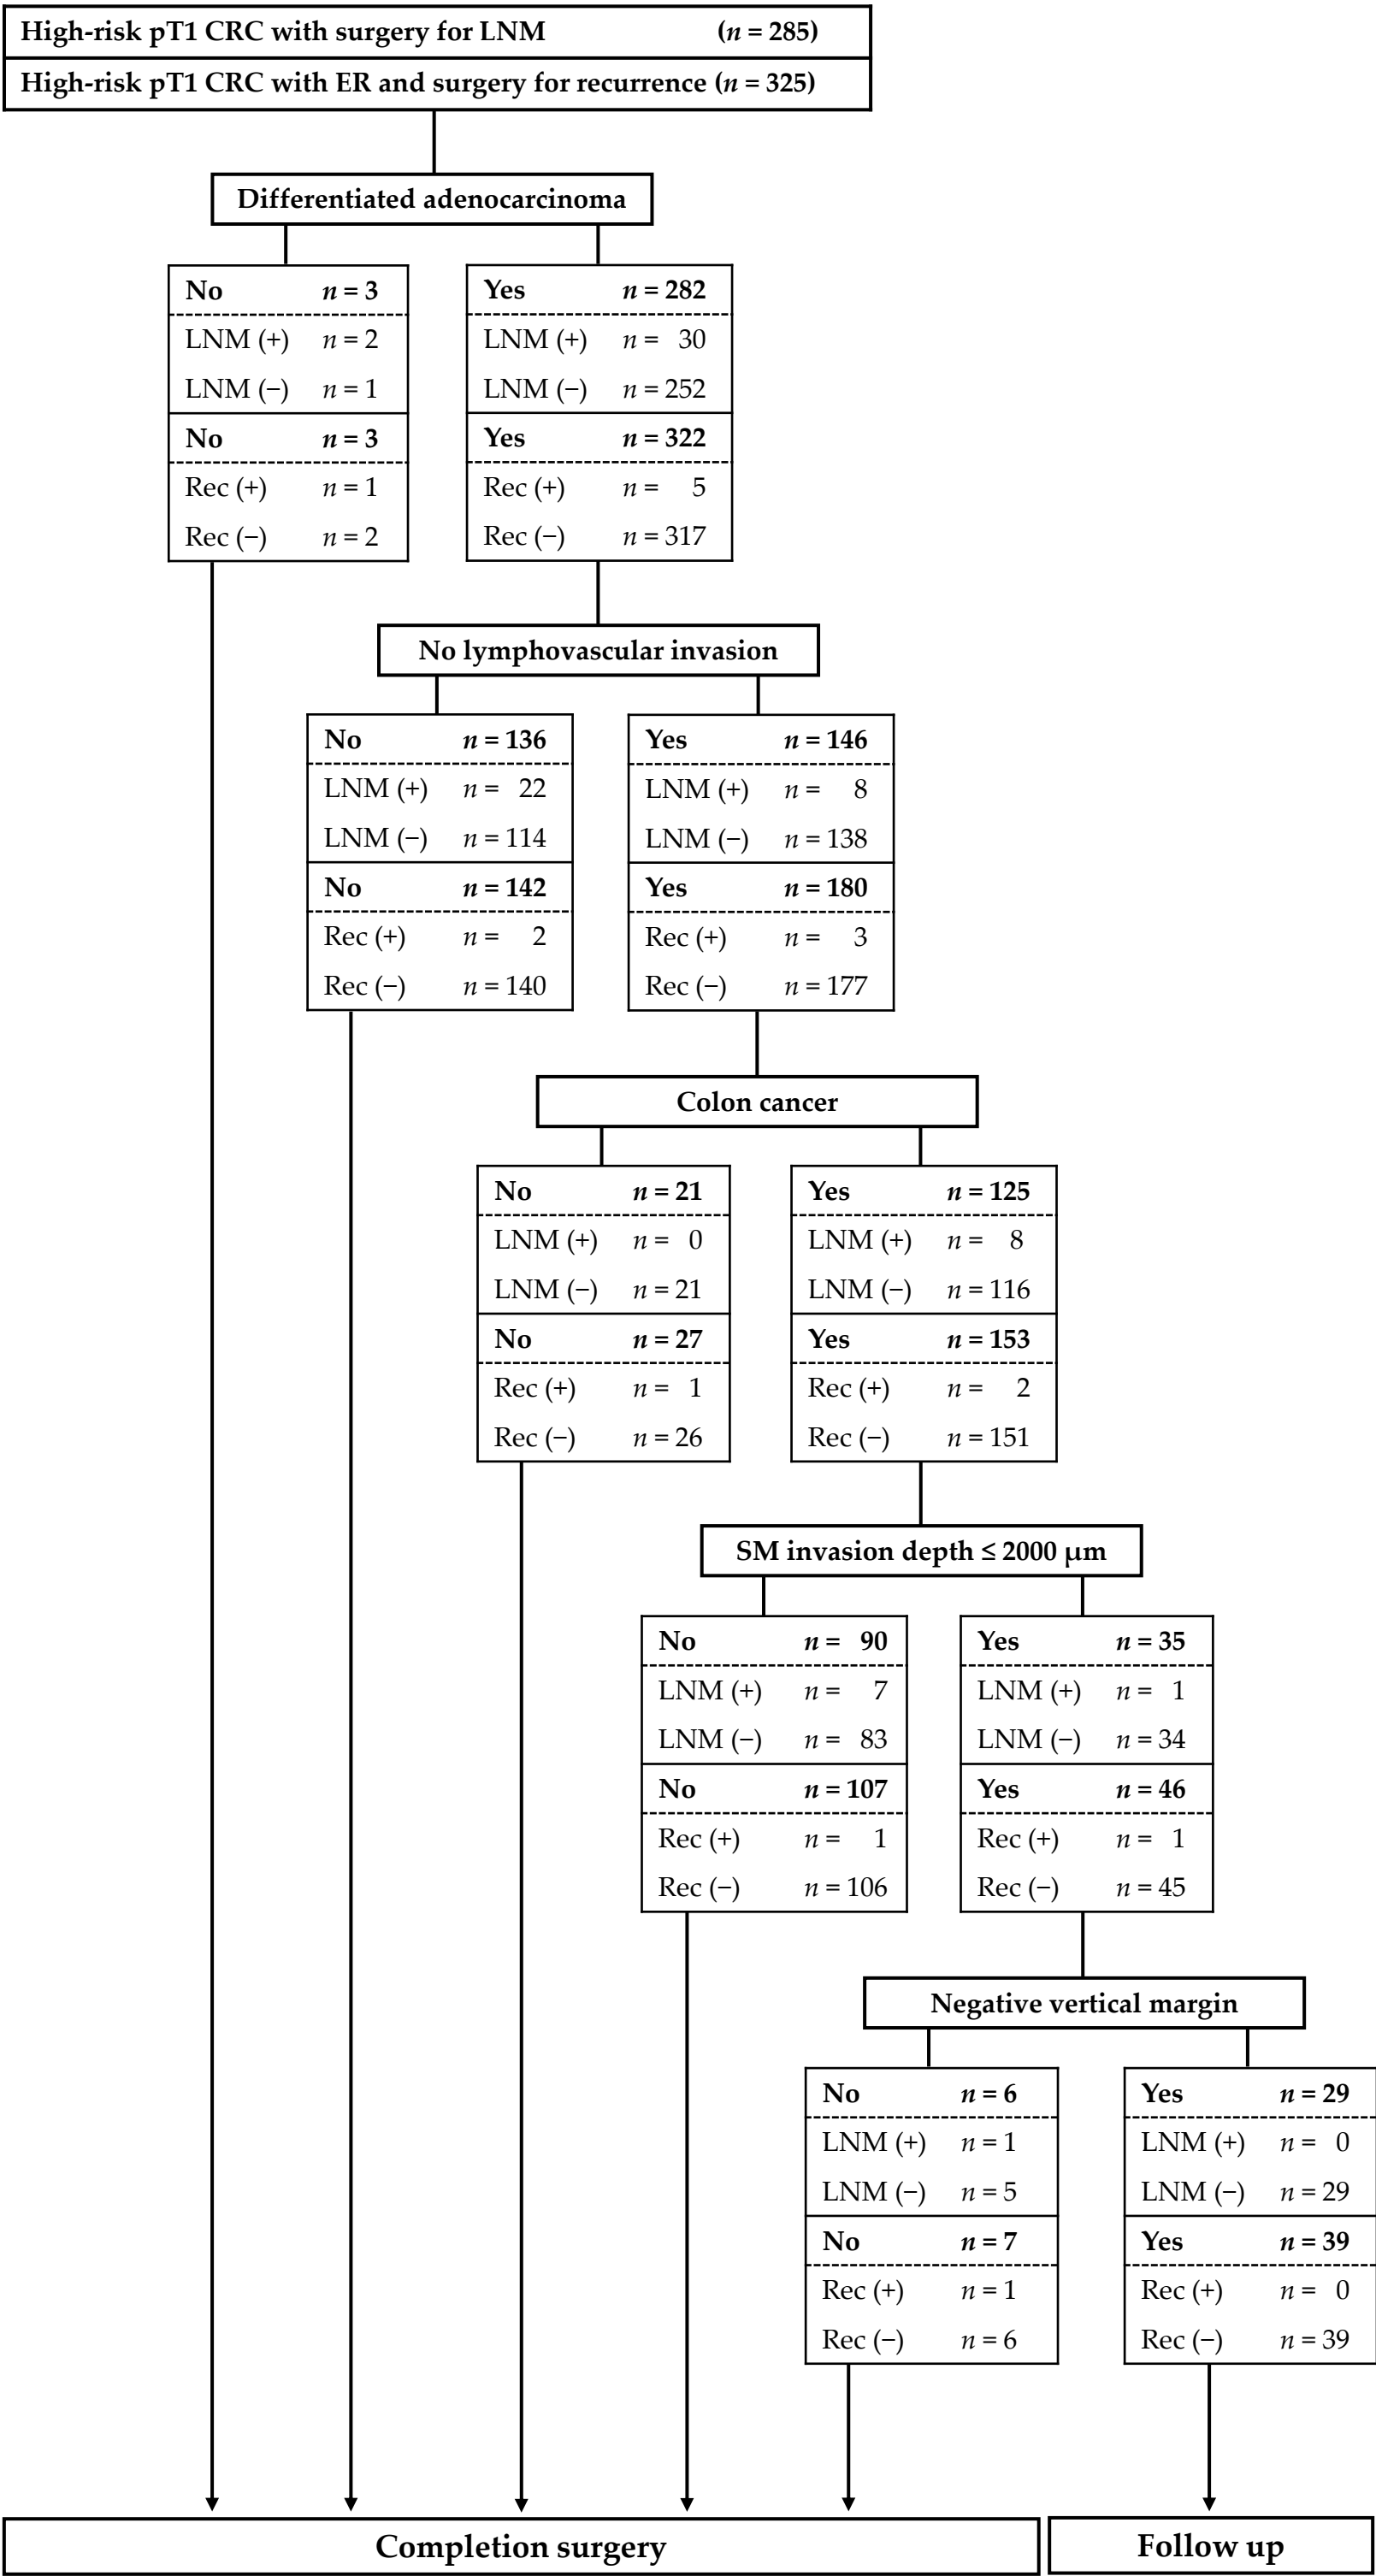

**Supplementary Figure S4. Decision tree to predict lymph node metastasis and recurrence**  
The incidence of LNM was analyzed using the high-risk pT1 CRC with surgery group (*n* = 285).  
The incidence of recurrence was analyzed using all high-risk pT1 CRCs with ER and surgery (*n* = 325).  
ER, endoscopic resection; LNM, lymph node metastasis; Rec, recurrence including metastatic and local intraluminal recurrences

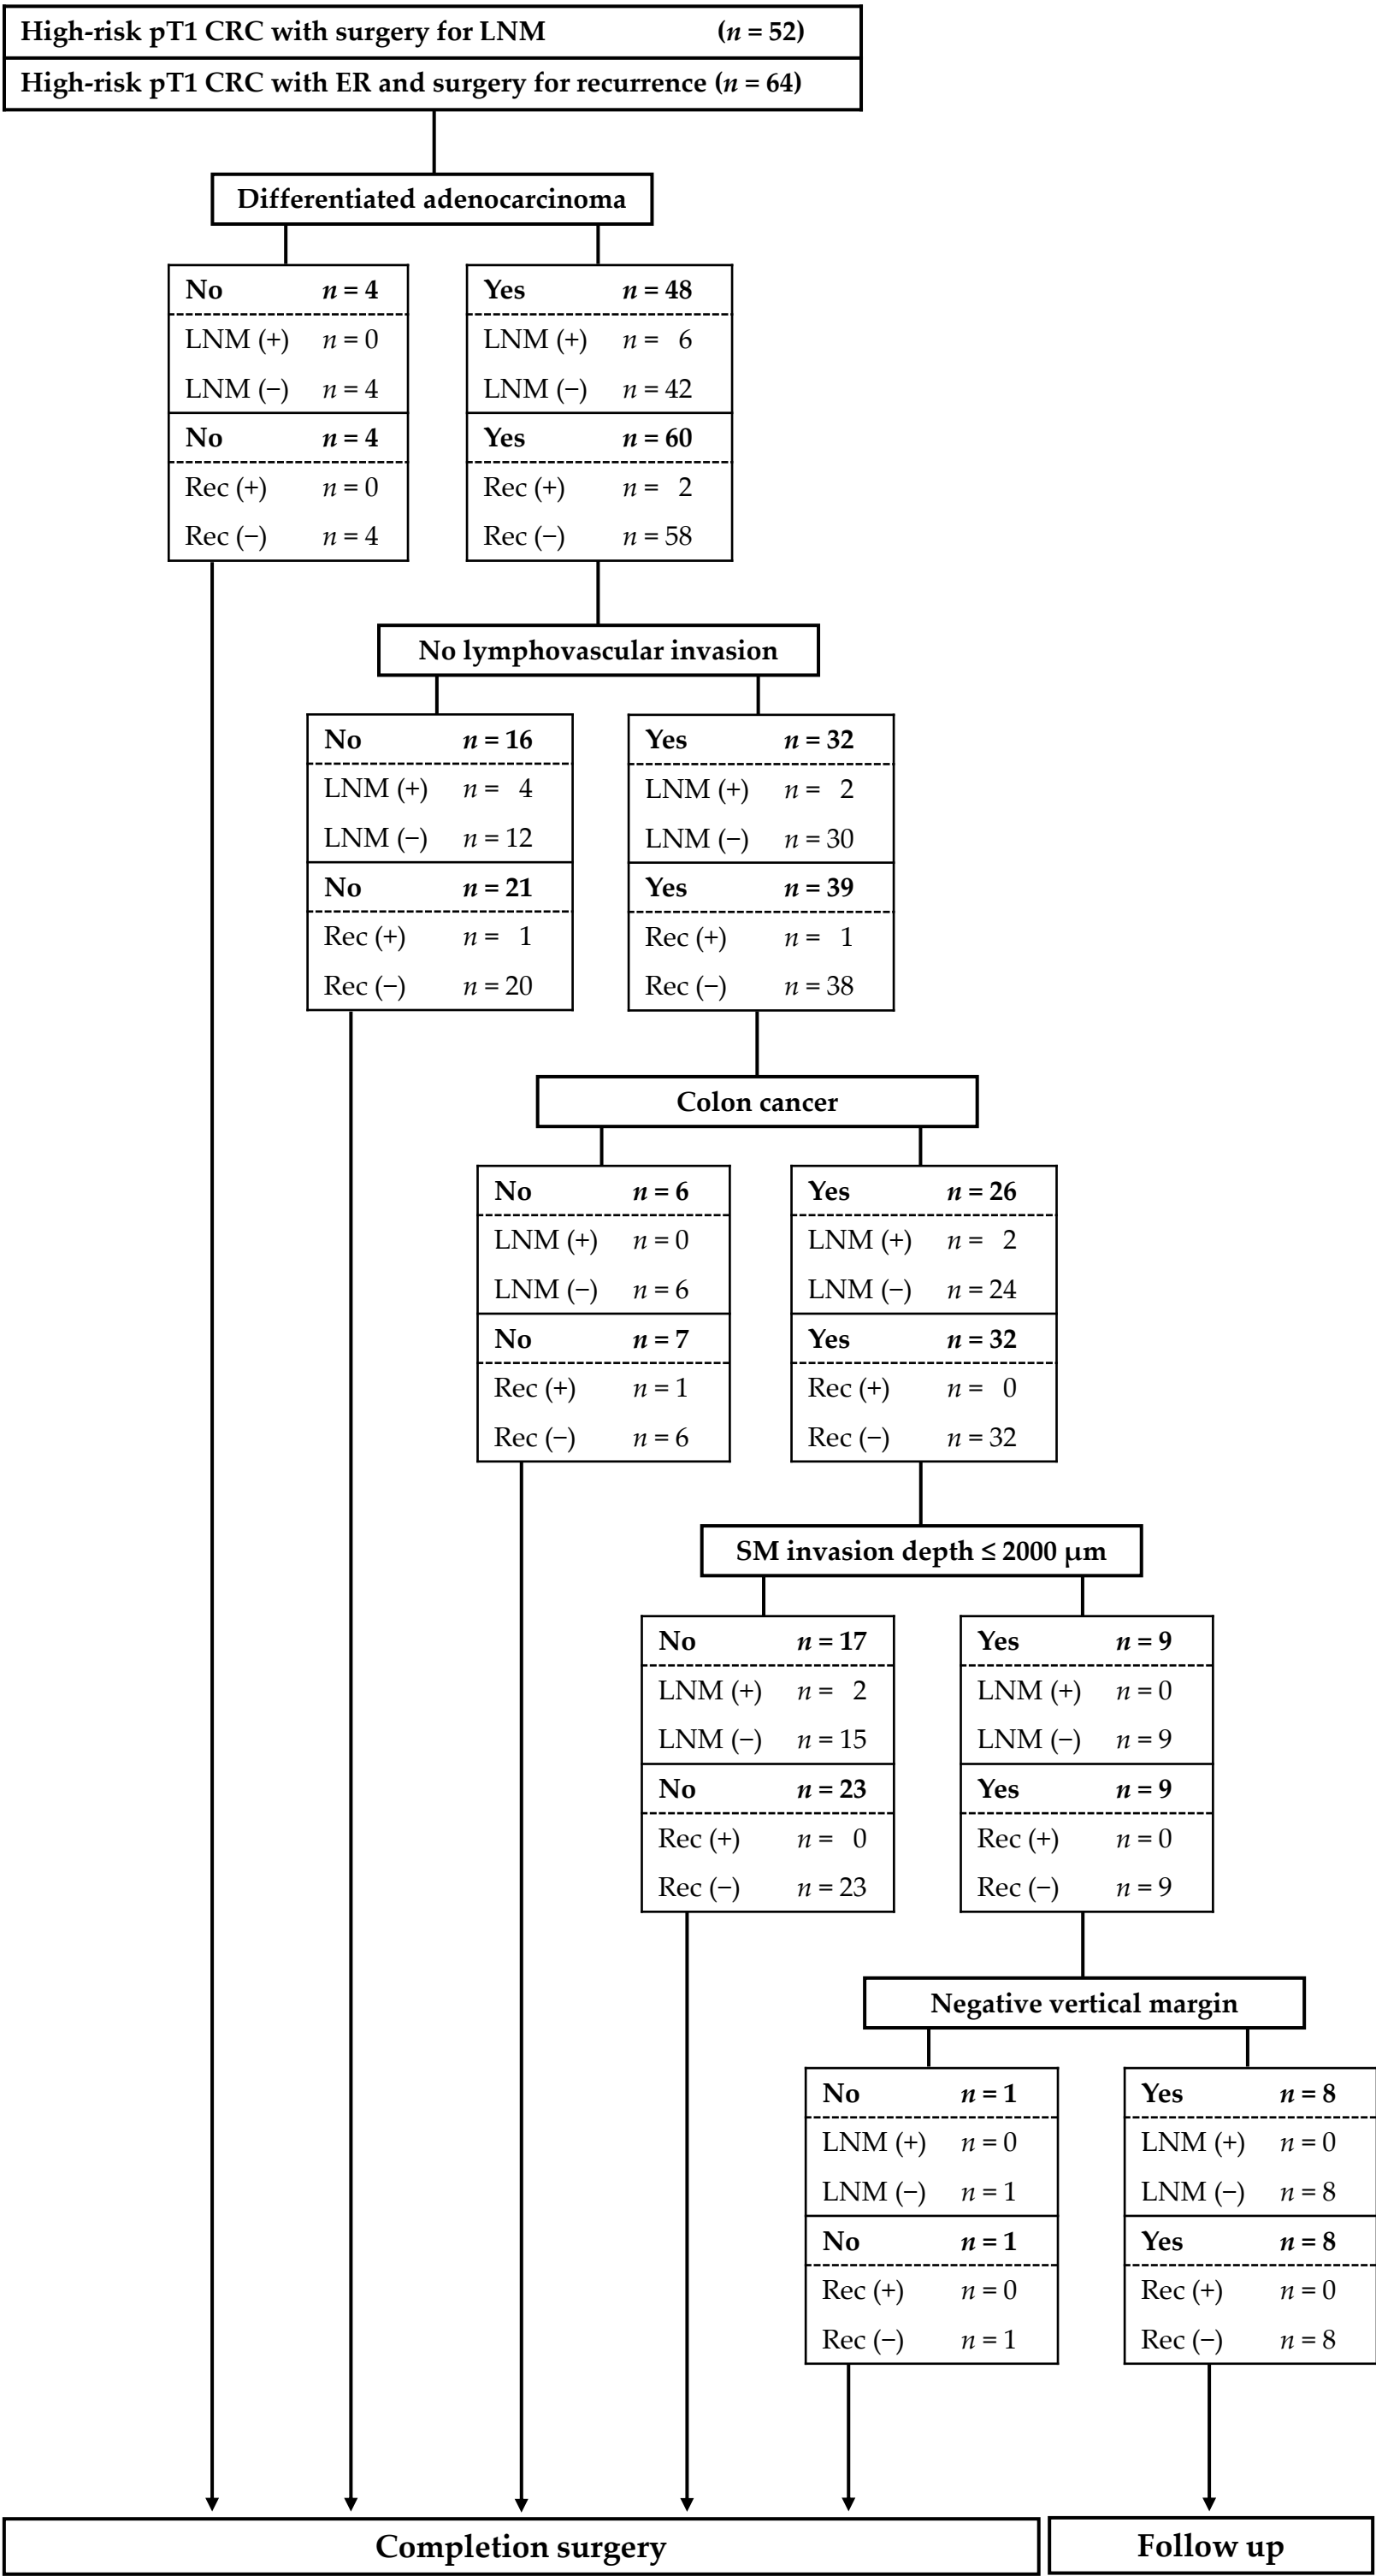

**Supplementary Figure S5. Decision tree to predict lymph node metastasis and recurrence in the validation cohort**  
The incidence of LNM was analyzed using the high-risk pT1 CRC with surgery group (n = 52).  
The incidence of recurrence was analyzed using all high-risk pT1 CRCs with ER and surgery (n = 64).  
ER, endoscopic resection; LNM, lymph node metastasis; Rec, recurrence including metastatic and local intraluminal recurrences

**Supplementary Table S1. Lymph node metastasis stratified according to submucosal invasion depth in the high-risk pT1 CRC**

| Risk factor: SM invasion depth alone | <i>n</i> | Lymph node metastasis |         | Incidence of LNM |
|--------------------------------------|----------|-----------------------|---------|------------------|
|                                      |          | LNM (–)               | LNM (+) |                  |
| 1000 µm ≤ SM ≤ 2000 µm               | 23       | 23                    | 0       | 0 %              |
| 2000 µm < SM ≤ 3000 µm               | 26       | 24                    | 2       | 7.7 %            |
| 3000 µm < SM ≤ 4000 µm               | 24       | 22                    | 2       | 8.3 %            |
| 4000 µm ≤ SM                         | 29       | 28                    | 1       | 3.4 %            |
| Total                                | 102      | 97                    | 5       | 4.9 %            |

Lesions with negative vertical margin that had only SM invasion depth as a risk factor were analyzed.  
LNM, Lymph node metastasis; SM, submucosal invasion depth

| Risk factor: VM (+)    | <i>n</i> | Lymph node metastasis |         | Incidence of LNM |
|------------------------|----------|-----------------------|---------|------------------|
|                        |          | LNM (–)               | LNM (+) |                  |
| SM ≤ 2000 µm           | 5        | 4                     | 1       | 25 %             |
| 2000 µm < SM ≤ 3000 µm | 8        | 7                     | 1       | 12.5 %           |
| 3000 µm < SM ≤ 4000 µm | 2        | 2                     | 0       | 0 %              |
| 4000 µm ≤ SM           | 3        | 3                     | 0       | 0 %              |
| Total                  | 18       | 16                    | 2       | 11.1%            |

Lesions with positive vertical margin were analyzed.  
LNM, Lymph node metastasis; SM, submucosal invasion depth; VM (+), positive vertical margin

| Risk factor: V/Ly (+) +VM (–) | <i>n</i> | Lymph node metastasis |         | Incidence of LNM |
|-------------------------------|----------|-----------------------|---------|------------------|
|                               |          | LNM (–)               | LNM (+) |                  |
| SM ≤ 2000 µm                  | 33       | 28                    | 5       | 16.7 %           |
| 2000 µm < SM ≤ 3000 µm        | 20       | 17                    | 3       | 15.0 %           |
| 3000 µm < SM ≤ 4000 µm        | 11       | 9                     | 2       | 18.2 %           |
| 4000 µm ≤ SM                  | 22       | 20                    | 2       | 9.1 %            |
| Total                         | 86       | 74                    | 12      | 14.0 %           |

Lesions with negative vertical margin that had lymphovascular invasion as a risk factor were analyzed.  
LNM, Lymph node metastasis; SM, submucosal invasion depth; V/Ly (+), positive lymphovascular invasion;  
VM (–), negative vertical margin

| Risk factor: BD (+) + VM (–) | <i>n</i> | Lymph node metastasis |         | Incidence of LNM |
|------------------------------|----------|-----------------------|---------|------------------|
|                              |          | LNM (–)               | LNM (+) |                  |
| SM ≤ 2000 µm                 | 8        | 8                     | 0       | 0 %              |
| 2000 µm < SM ≤ 3000 µm       | 9        | 8                     | 1       | 11.1 %           |
| 3000 µm < SM ≤ 4000 µm       | 3        | 3                     | 0       | 0 %              |
| 4000 µm ≤ SM                 | 5        | 5                     | 0       | 0 %              |
| Total                        | 25       | 24                    | 1       | 4.0 %            |

Lesions with negative vertical margin that had budding as a risk factor were analyzed.  
LNM, Lymph node metastasis; SM, submucosal invasion depth; BD (+), positive budding;  
VM (–), negative vertical margin

**Supplementary Table S2. Risk factors for overall survival in the high-risk group with surgical resection**

|                        |                    | Univariate analysis |          |
|------------------------|--------------------|---------------------|----------|
|                        |                    | 5-year OS           | <i>p</i> |
| Age                    | ≤70 years          | 96.8 %              | 0.768    |
|                        | >70 years          | 94.1 %              |          |
| Gender                 | Male               | 95.0 %              | 0.072    |
|                        | Female             | 96.5 %              |          |
| Location               | colon              | 95.0 %              | 0.799    |
|                        | rectum             | 98.1 %              |          |
| Tumor size             | ≤20 mm             | 95.9 %              | 0.698    |
|                        | >20 mm             | 95.3 %              |          |
| Morphology             | Protruded          | 96.1 %              | 0.600    |
|                        | Flat/Flat elevated | 97.2 %              |          |
|                        | Depressed          | 94.9 %              |          |
| Histology              | differentiated     | 95.6 %              | 0.761    |
|                        | undifferentiated   | 100 %               |          |
| SM invasion depth      | ≤2000 μm           | 98.4 %              | 0.211    |
|                        | >2000 μm           | 95.48%              |          |
| Vascular invasion      | (−)                | 95.8 %              | 0.470    |
|                        | (+)                | 95.0 %              |          |
| Lymphatic invasion     | (−)                | 97.7 %              | 0.757    |
|                        | (+)                | 93.2 %              |          |
| Budding                | (−)                | 94.1 %              | 0.193    |
|                        | (+)                | 100 %               |          |
| Horizontal margin*     | HM0                | 95.1 %              | 0.442    |
|                        | HM1/X              | 93.8 %              |          |
| Vertical margin*       | VM0                | 97.9 %              | 0.111    |
|                        | HM1/X              | 90.0 %              |          |
| Number of dissected LN | <12                | 94.7 %              | 0.662    |
|                        | ≥12                | 99.0 %              |          |
| Lymph node metastasis  | (−)                | 95.2 %              | 0.195    |
|                        | (+)                | 100 %               |          |

SM invasion depth, submucosal invasion depth  
HM, Horizontal margin; VM, vertical margin; LN, lymph node

\*, Total number that assessed vertical and horizontal margins was consisted of 104 patients with endoscopic resection before surgery.

Supplementary Table S3. Validation cohort of the high-risk pT1 CRC

|                                |                                 | High-risk<br>with ER alone<br>( <i>n</i> = 12) | High-risk<br>with surgery<br>( <i>n</i> = 52) |
|--------------------------------|---------------------------------|------------------------------------------------|-----------------------------------------------|
| Age (years)                    | Median (range)                  | 76 (45-92)                                     | 65 (25-87)                                    |
| Gender                         | Male                            | 7                                              | 32                                            |
|                                | Female                          | 5                                              | 20                                            |
| Location                       | Colon                           | 10                                             | 41                                            |
|                                | Rectum                          | 2                                              | 11                                            |
| Tumor size (mm)                | Median (range)                  | 11 (8-25)                                      | 18 (6-35)                                     |
| Morphology                     | Protruded type                  | 9                                              | 30                                            |
|                                | Flat or Flat elevated type      | 0                                              | 0                                             |
|                                | Depressed type                  | 3                                              | 22                                            |
| Pathological risk factors      | Undifferentiated histology      | 0 (0 %)                                        | 4 (7.7 %)                                     |
|                                | SM invasion depth ≥1000 μm      | 12 (100 %)                                     | 48 (92.3 %)                                   |
|                                | Vascular invasion               | 1 (8.3 %)                                      | 9 (17.3 %)                                    |
|                                | Lymphatic invasion              | 4 (33.3 %)                                     | 12 (23.1 %)                                   |
|                                | Budding                         | 1 (8.3 %)                                      | 11 (21.2 %)                                   |
| Surgical resection             | ER alone                        | 12                                             | 0                                             |
|                                | ER followed by curative surgery | 0                                              | 25                                            |
|                                | Curative surgery                | 0                                              | 27                                            |
| Horizontal margin              | HM0/HM1/HMX                     | 12/0/0                                         | 24/0/1                                        |
| Vertical margin                | VM0/VM1/VMX                     | 12/0/0                                         | 20/4/1                                        |
| Number of examined lymph nodes | Median (range)                  | –                                              | 15 (2-47)                                     |
| Lymph node metastasis          |                                 | –                                              | 6/52 (11.5%)                                  |
| Recurrence                     | local                           | 0/12 (0 %)                                     | 0/52 (0 %)                                    |
|                                | metastasis                      | 0/12 (0 %)                                     | 2/52 (3.8 %)                                  |

High-risk, lesions with any of pathological risk factors; SM invasion depth, submucosal invasion depth; ER, endoscopic resection
